# Supplementary material
Source: PubMed Central journal article supplement (PMC3680541)
Supplement: cc-12-1616-s01.pdf [file cc-12-1616-s01.pdf]

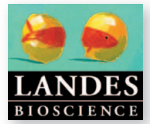

## **Supplemental Material to:**

**Katie Howe and Greg FitzHarris**

**A non-canonical mode of microtubule organization  
operates throughout pre-implantation development in  
mouse**

**2013; 12(10)**

**<http://dx.doi.org/10.4161/cc.24755>**

**<http://www.landesbioscience.com/journals/cc/article/24755>**

# Figure S1

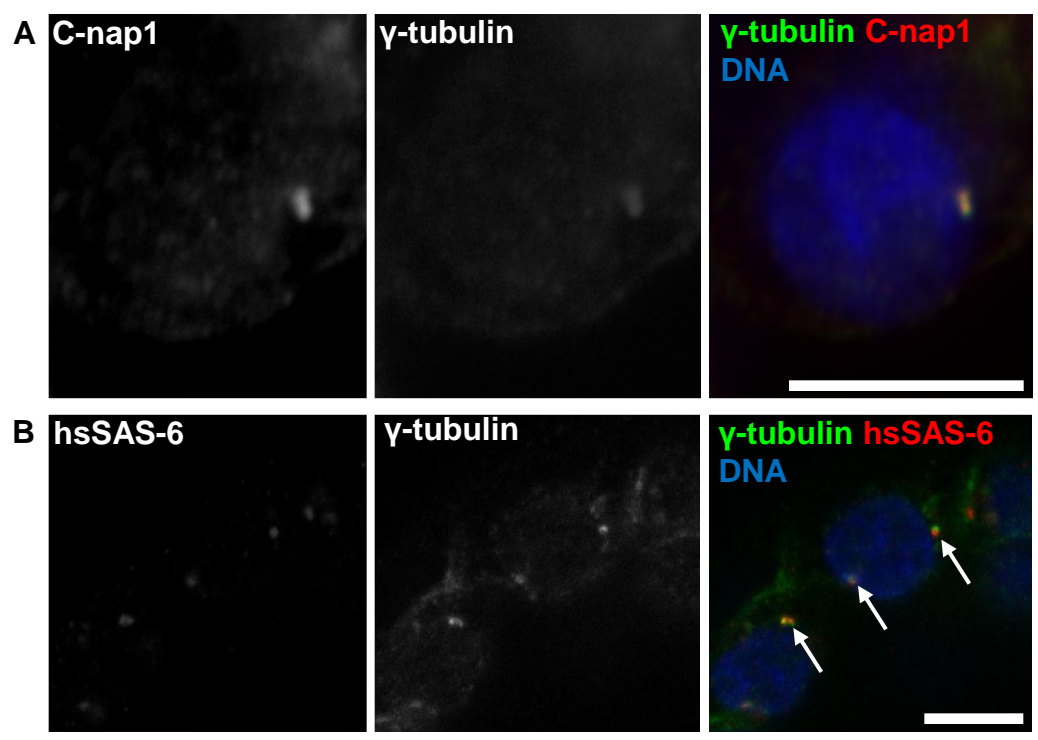

# Figure S2

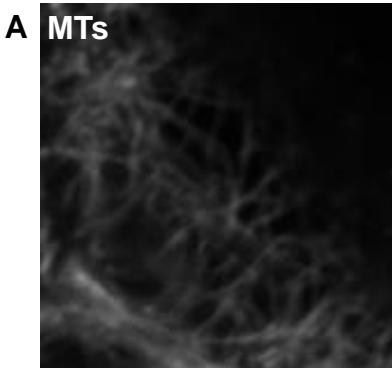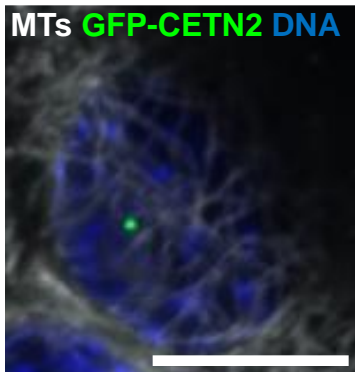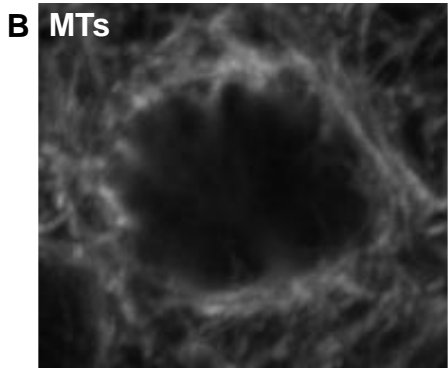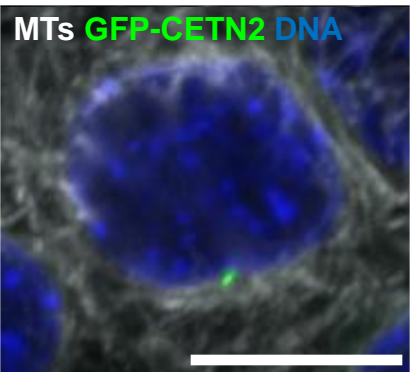

**Figure S3**

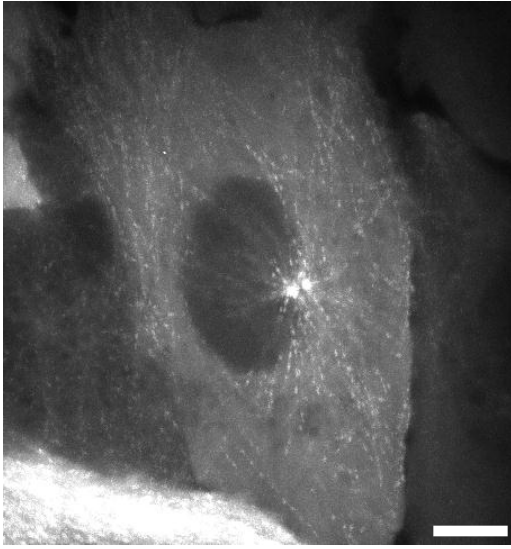

**Figure S4**

**4-cell**

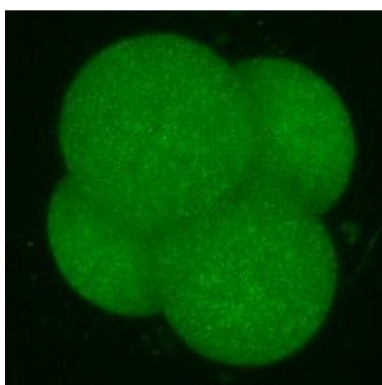

**Morula**

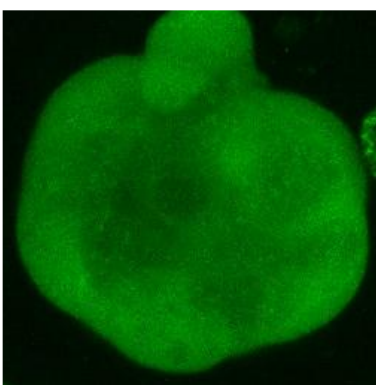

**Blastocyst**

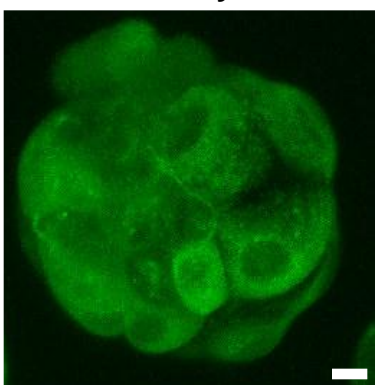

**Figure S5**

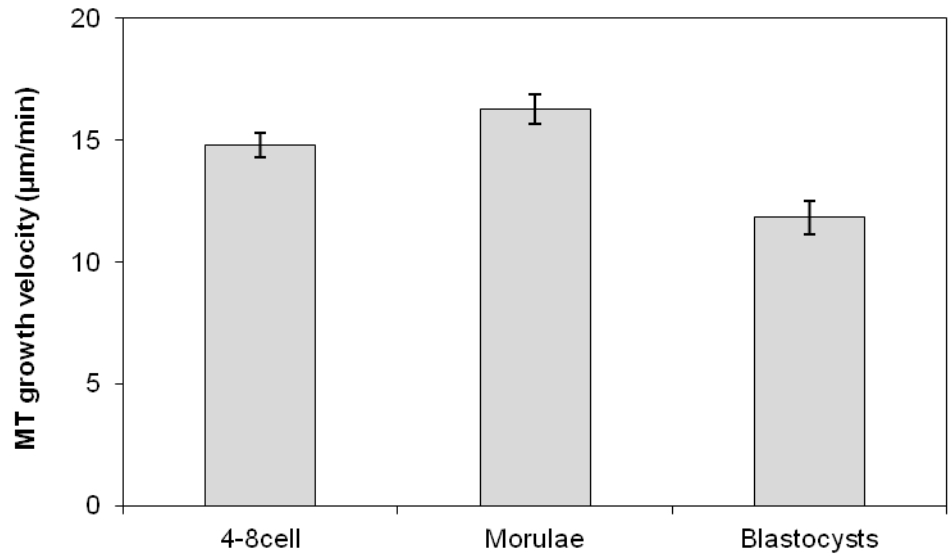

# Figure S6

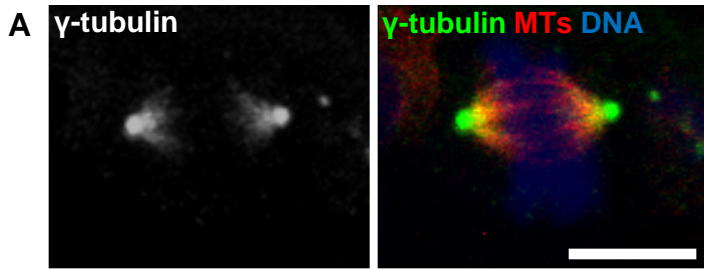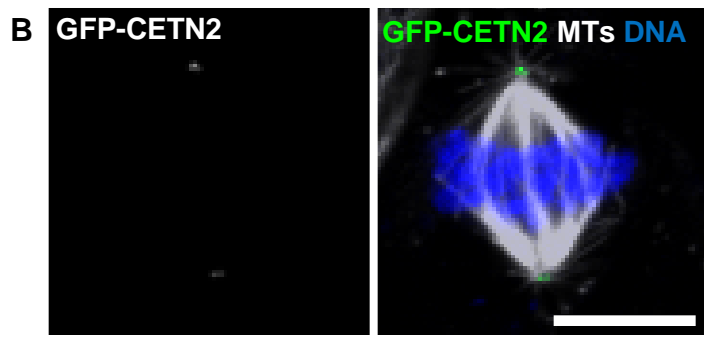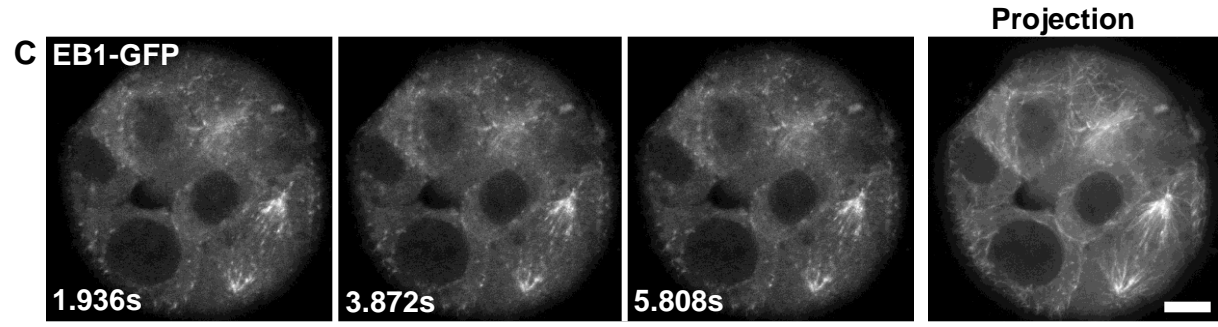

## **SUPPLEMENTARY MATERIAL**

### **SUPPLEMENTARY FIGURE LEGENDS**

**Figure S1.** Immunolocalisation of known centrosomal proteins to centrosomes in blastocysts. Antibodies used are (A) mouse anti-C-nap1 (BD biosciences) and (B) rabbit anti-hsSAS-6 (gift from Pierre Gönczy [46]). Scale 10 $\mu$ m.

**Figure S2.** Additional examples of centriole positioning relative to the MT network in embryos. Note in S2A the centrioles are located at a MT-sparse site, as was the case for the vast majority of centrioles examined. S2B shows an example in which the centrosome lies in close apposition to a thickening of MTs. Centrioles were judged to be in apposition to a MT thickening in 62/433 of cases (~14%). Scale 10 $\mu$ m.

**Figure S3.** Example of an EB1::GFP-expressing somatic cultured cell. Images from a movie generated by Lynn Cassimeris (Bethlehem, PA) of an LLCPK (porcine kidney epithelial) cell stably expressing EB1::GFP. Note that the centrosome is easily identifiable as an enrichment of EB1::GFP fluorescence adjacent to the nucleus, and that EB1::GFP comets emanate radially from that major MTOC. Scale 10 $\mu$ m.

**Figure S4.** (A) Z-projection images of EB1::GFP in early embryos. Note the absence of a major accumulation of EB1::GFP such as is seen in EB1::GFP-expressing somatic cells. Scale 10 $\mu$ m.

**Figure S5.** Analysis of MT growth velocity in 4-8-cell, morula, and blastocyst stage embryos. Tracks were identified and velocities measured using *plusTipTracker* software. 14589-19707 tracks were examined from 20-21 movies per developmental stage. Data shown is an average of the mean velocity calculated from each movie examined. Blastocysts were significantly different from both morulae and 4-8 cell embryos (ANOVA + Tukey-Kramers,  $P < 0.01$ ).

**Figure S6.** Centrosomes localise to spindle poles in embryonic mitosis. (A) Typical images of mitotic spindles in blastocysts. Centrosomes labelled with  $\gamma$ -tubulin antibodies (top panel), or GFP::CETN (bottom). Note that centrosomes are located at spindle poles. (B) EB1::GFP analysis of a blastocyst spindle. Scale 10 $\mu$ m.
